# Supplementary material for: WDR76 Co-Localizes with Heterochromatin Related Proteins and Rapidly Responds to DNA Damage
Source: PubMed Central journal article supplement (PMC4889050; doi:10.1371/journal.pone.0155492), 2016-06-01
Supplement: pone.0155492.s004.pdf [file pone.0155492.s004.pdf]

**A**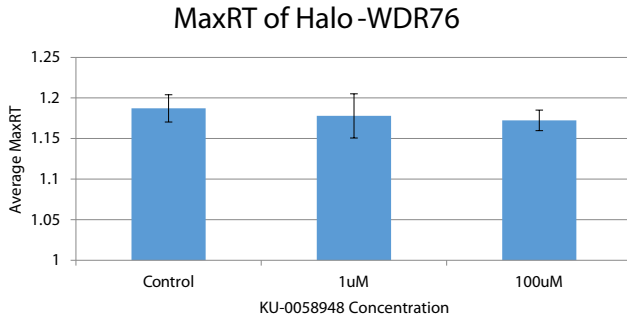**B**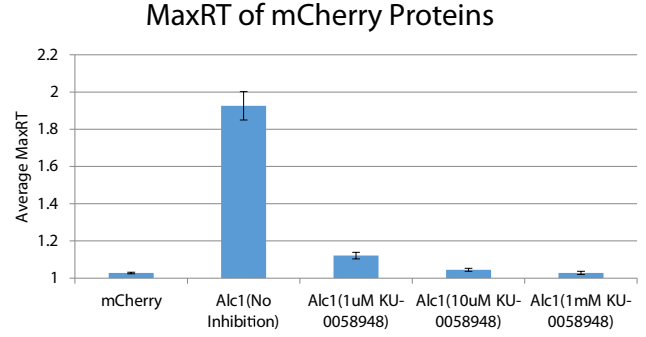**C**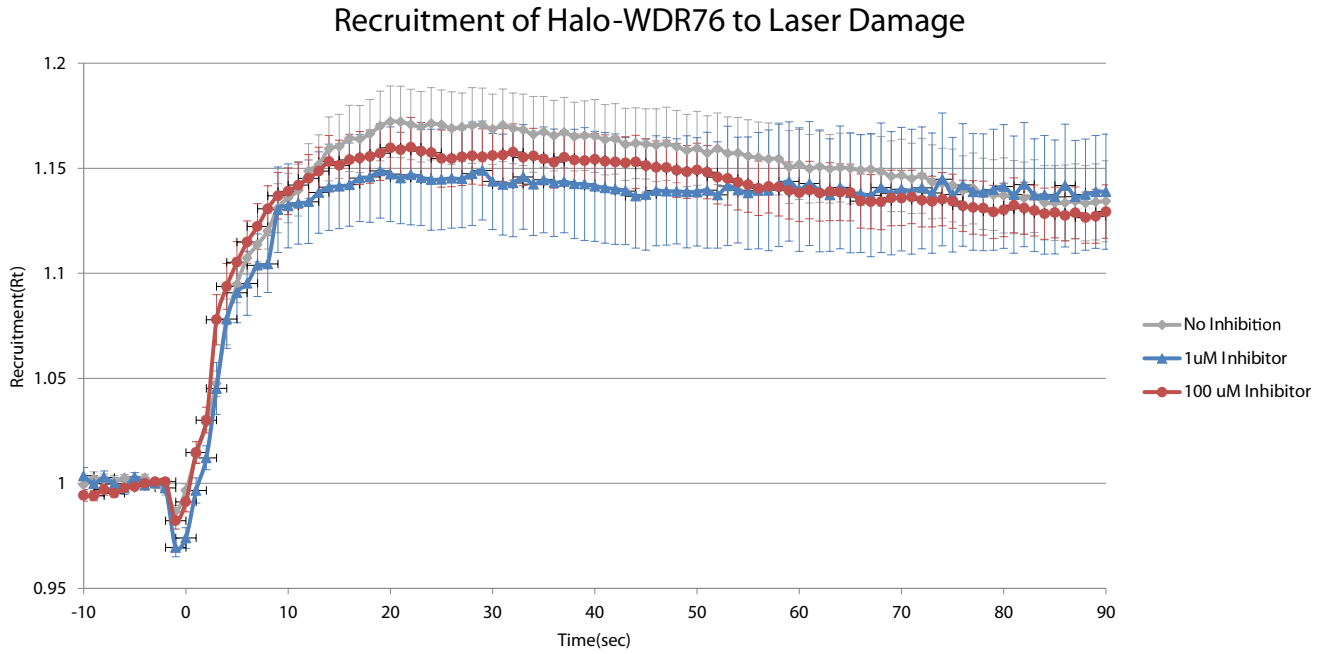

S4 Fig
